# Supplementary material
Source: publisher figshare collection journal article supplement (https://tandf.figshare.com/ndownloader/files/24421609)
Supplement: Supplementary file [file 24421609]

# Synthesis and Characterization of Magnetic Nanoparticles coated with Polystyrene Sulfonic Acid for Biomedical Applications

Bo-Wei Chen<sup>1#</sup>, Yun-Chi He<sup>2#</sup>, Shian-Ying Sung<sup>3,4</sup>, Trang Thi Huynh Le<sup>5</sup>, Chia-Ling Hsieh<sup>3,4\*</sup>, Jiann-Yeu Chen<sup>6</sup>, Zung-Hang Wei<sup>1,2</sup> and Da-Jeng Yao<sup>1,2\*</sup>

1 Institute of NanoEngineering and MicroSystems, National Tsing Hua University, Hsinchu, Taiwan

2 Department of Power Mechanical Engineering, National Tsing Hua University, Hsinchu, Taiwan

3 Ph.D. Program for Translational Medicine, College of Medical Science and Technology, Taipei Medical University, Taipei, Taiwan

4 TMU Research Center of Cancer Translational Medicine, Taipei Medical University, Taipei, Taiwan

5 International Master/Ph.D. Program in Medicine, College of Medicine, Taipei Medical University, Taipei, Taiwan

6 Center of Nanoscience and Nanotechnology, National Chung Hsing University, Taichung, Taiwan

\*Correspondence and requests for materials should be addressed to C.-L.H. (email: [chsieh2@tmu.edu.tw](mailto:chsieh2@tmu.edu.tw)) and D.-J.Y. ([djyao@mx.nthu.edu.tw](mailto:djyao@mx.nthu.edu.tw))

# These authors contributed equally to this work

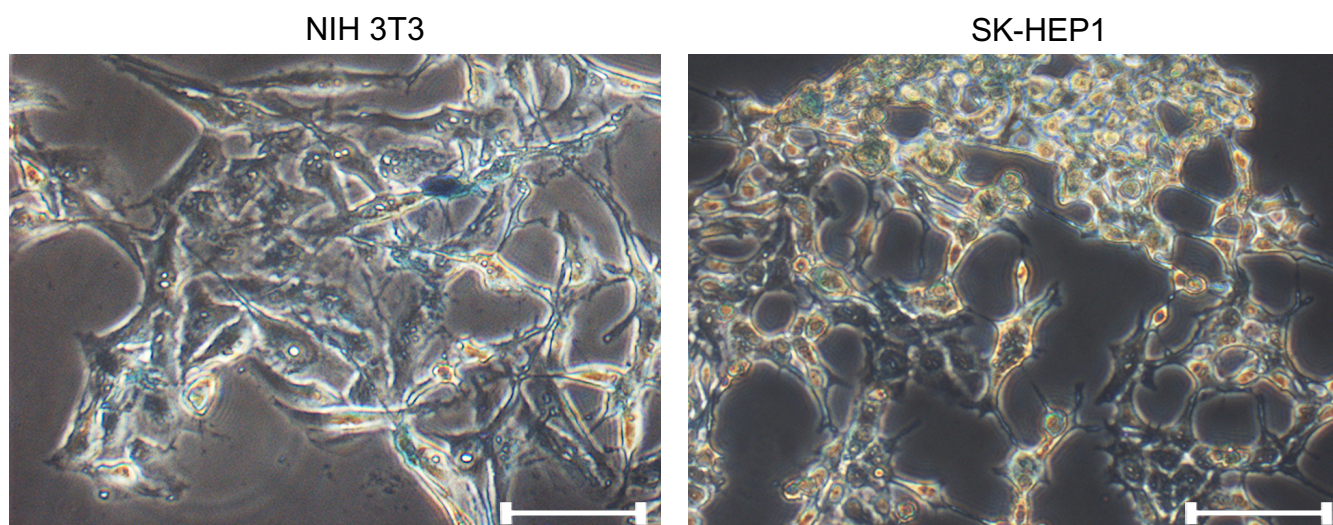

Figure S1. Prussian blue staining for PSS-MNPs-positive cells. The cropped images of Figures 4d,e ( $400 \mu\text{g mL}^{-1}$ ) shows the cellular localization of PSS-MNPs at the cytoplasm around the nuclei of cells. Scale bar =  $30 \mu\text{m}$ .

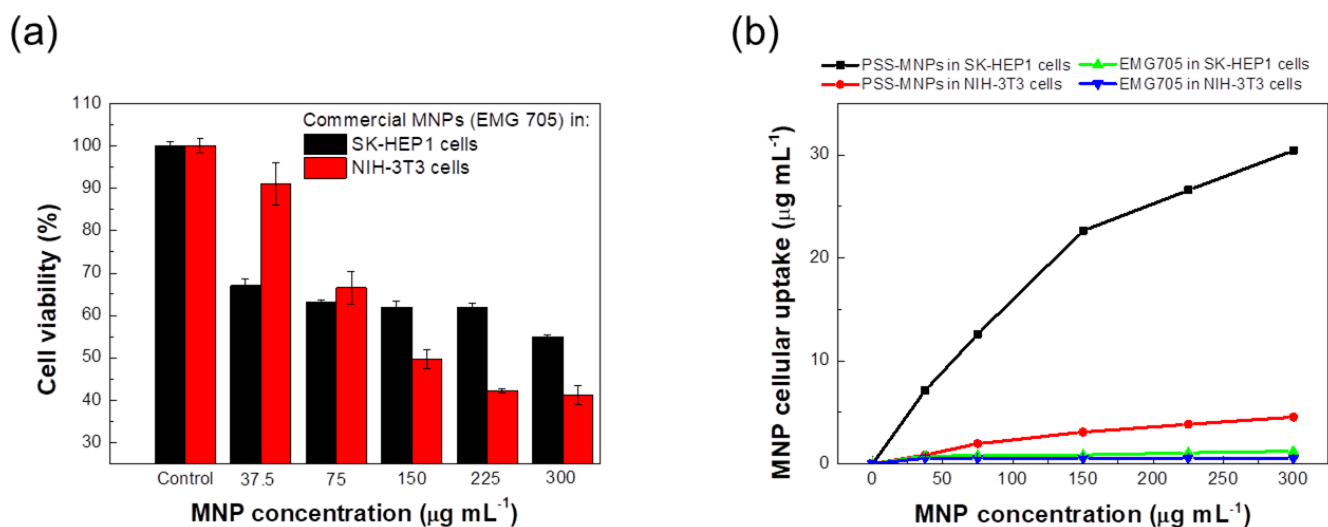

Figure S2. Cytotoxicity and cellular uptake of a commercialized MNP product EMG 705 (Ferrotec Corp.) in SK-HEP1 and NIH-3T3 cells. Cells were treated with EMG 705 at concentrations of 37.5, 75, 150 and 300  $\mu\text{g mL}^{-1}$  for 24 h and then subjected to (a) MTT cell viability assay and (b) Prussian blue assay for MNP contents. The data is presented as as mean  $\pm$  SD of 3 independent experiments ( $n = 6$ ).
